# Supplementary material for: Interdiffused thermoplastic urethane-PEDOT:PSS bilayers with superior adhesion properties for high-performance and intrinsically-stretchable organic solar cells
Source: Royal Society of Chemistry journal article supplement (doi:10.1039/d2ta09874a), 2023-01-01
Supplement: d2ta09874a1.pdf [file d2ta09874a1.pdf]

Supplementary Information for

**Interdiffused Thermoplastic Urethane–PEDOT:PSS Bilayers with Superior Adhesion Properties for High–Performance and Intrinsically–Stretchable Organic Solar Cells**

*Jinho Lee,<sup>†,a</sup> Jin-Woo Lee,<sup>†,a</sup> Hyunggi Song,<sup>b</sup> Myoung Song,<sup>b</sup> Jinseok Park,<sup>a</sup> Geon-U Kim,<sup>a</sup> Dahyun Jeong,<sup>a</sup> Taek-Soo Kim,<sup>b</sup> and Bumjoon J. Kim<sup>\*,a</sup>*

<sup>a</sup>Department of Chemical and Biomolecular Engineering and <sup>b</sup>Mechanical Engineering, Korea Advanced Institute of Science and Technology (KAIST), Daejeon 34141, Republic of Korea

\*Electronic mail: [bumjoonkim@kaist.ac.kr](mailto:bumjoonkim@kaist.ac.kr)

## **Experimental Section**

### **Materials**

PEDOT:PSS (Clevios PH1000 and Clevios P VP AI 4083) solutions were purchased from Heraeus. Perchloric acid (HClO<sub>4</sub>), chlorobenzene (CB), chloroform (CF), methanol, octadecyltrichlorosilane (ODTS), toluene, 3-glycidoxypropyltrimethoxysilane (GOPS), dimethylformamide (DMF), 1-chloronaphthalene (CN), 1,8-diiodooctane (DIO) and dimethyl Sulfoxide (DMSO) were purchased from Sigma-Aldrich. PM6, PCE12, Y6 and Y6-BO were purchased from Derthon. N2200 polymer (Mn: 150 k, PDI: 3.0) and PNDIT-F3N-Br were synthesized. TPU film was received from AFEL. Gallium (Ga, 99.99 % purity) and Indium (In, 99.99 % purity) were obtained from Taewon Scientific.

### **Preparation of acid-treated electrodes for transfer**

ODTS hydrophobic treatment was applied to the glass substrate to facilitate the transfer process. After immersing the plasma-treated glass substrate in a mixture of 50 ml of toluene and 60  $\mu$ l of ODTS at room temperature for 30 min, it was washed with acetone and dried in an oven at 80 °C. The PEDOT:PSS (doped with 0.5 vol.% of FS-30, 5 vol.% of DMSO and 0.15 vol.% of GOPS) solution was filtered through a 0.45  $\mu$ m polytetrafluorethylene (PTFE) filter, and then deposited on the ODTS treated glass substrate by spin-coating (1000 rpm) and dried at 100 °C in air (thickness: ~150 nm). 4 M HClO<sub>4</sub> solution was dropwise to the surface of the PEDOT:PSS film, and immediately washed with a spin-dry process, and dried on a hot plate at 100 °C for 15 min to remove residual acid (thickness: ~113 nm). For the molecular interdiffusion (MID)-assisted poly(3,4-ethylenedioxythiophene):poly(styrenesulfonate)-thermoplastic urethane (PEDOT:PSS-TPU) layers, the TPU solution (dissolved in DMF at 450 mg mL<sup>-1</sup>) was spin-coated (4000 rpm) on acid-treated PEDOT:PSS and dried at 100 °C. In the

stamp transfer (ST) method, the pick-and-placed PEDOT:PSS bottom electrode layer was laid to the TPU film while slowly attaching/detaching the TPU film on an 80 °C hot plate.

### **Device Fabrication**

IS-OSCs were fabricated with TPU/acid-treated PEDOT:PSS/AI 4083/active layer/PNDIT-F3N-Br/eutectic gallium indium (EGaIn) structure. The transferred TPU/acid-treated PEDOT:PSS electrode was attached to a glass substrate for use as a bottom electrode. The hole transport layer (HTL, Clevios P VP AI 4083, doped with 0.5 vol.% of FS-30) was spin-coated at 3000 rpm (thickness: ~30 nm) on the plasma-treated bottom electrode and then annealed at 100 °C for 15 min. The active material was coated in a glove box. A blend of PM6:Y6-BO:N2200 with a weight ratio (1:1:0.15) was stirred for at least 3 h in CB at a total concentration of 24 mg mL<sup>-1</sup> and then spin-coated at 2500 rpm, 30 s (thickness: ~100 nm) on top of the TPU/acid-treated PEDOT:PSS/AI4083. A blend of PM6:Y6 (1:1.2, w/w) in CF (containing 0.5 vol% of 1-chloronaphthalene (CN)) with a total concentration of 13.5 mg mL<sup>-1</sup> solution was spuncast at 2500 rpm for 30 s (thickness: ~100 nm). A blend of PM6-OEG5:BTP-eC9 (1:1.2, w/w) in toluene (containing 0.5 vol% of DIO) with a total concentration of 18 mg mL<sup>-1</sup> solution was spuncast at 1500 rpm for 30 s (thickness: ~110 nm). A blend of PBDB-T:PYBDT-Cl (1:1, w/w) in CB with a total concentration of 20 mg mL<sup>-1</sup> solution was spun at 2000 rpm for 30 s (thickness: ~100 nm). All devices coated with the active layer were vacuum (< 10<sup>-5</sup> torr) dried for 1 h. Then, an electron transport layer (ETL, PNDIT-F3N-Br) solution (total concentration of 1 mg mL<sup>-1</sup> in methanol, stirred at room temperature for 3 h) was spin-coated at 3000 rpm for 30 s (thickness: ~5 nm) on the active layer. A top electrode, EGaIn, 75.5 wt% of Ga and 24.5 wt% of In were mixed at 80 °C. To pattern the electrodes, a liquid metal alloy was sprayed (thickness: ~100 μm) onto the ETL layer using a

shadow mask.

## **Characterizations**

The transmission spectrum of the PEDOT:PSS electrode was measured with a UV-vis spectrophotometer (UV-1800, Shimadzu). Sheet resistances of the PEDOT:PSS films were measured by using a four point probe. The ultraviolet photoelectron spectroscopy (UPS) profiles were obtained by Sigma Probe from Thermo VG Scientific Thermo VG Scientific incorporation. The 90 ° peel tests were performed using an adhesion tester (DTS company, 50 lbf load cell) operated at a peeling rate of 0.1 mm s<sup>-1</sup> with an adhesive tape (12 mm width). The time-of-flight secondary ion mass spectrometry (TOF-SIMS) depth profiling analysis (sputtered with 5 keV Ar<sup>+</sup> and 500 × 500 μm<sup>2</sup>) was performed to investigate the interfacial properties between the PEDOT:PSS electrode and the TPU. Relative resistance (R/R<sub>0</sub>) and tensile cycle test of PEDOT:PSS film were measured using a stretching tester (JIRBT-620, Junil Tech., South Korea). Atomic force microscopy (AFM, Parks Systems NX20) was used to analyze the surface morphology of PEDOT:PSS film. To measure the thickness of PEDOT:PSS film, we used a surface profiler (Tencor α-Step IQ). The PCE was determined under ambient conditions with a solar simulator (K201 LAB55, McScience). The photovoltaic performance was measured under air mass 1.5 solar illumination at 100 mW cm<sup>-2</sup> (1 sun). The intensity of the solar simulator was calibrated using a standard silicon reference cell (K801S-K302, McScience). The current density-voltage (*J-V*) characteristics were recorded using a Keithley 2400 SMU semiconductor characterization system. A shadow mask (0.04 cm<sup>2</sup>) was used to define the photoactive area during the measurements. And, we measured the change in properties of IS-OSCs according to elongational deformation using a manually adjustable tensile strain test holder. External quantum efficiency (EQE) spectra were measured by K3100

15 IQX (McScience Inc.) and MC 2000 optical chopper (Thorlabs) under ambient conditions.

### Calculation of FoM value

The FoM is defined as the ratio of direct current conductivity ( $\sigma_{dc}$ ) to optical conductivity ( $\sigma_{op}$ ). It can be calculated as sheet resistance ( $\Omega \text{ sq}^{-1}$ ), transmittance (%), at  $\lambda = 550 \text{ nm}$  and impedance of free space ( $Z_0, 377 \Omega$ ).

$$FoM = \frac{\sigma_{dc}}{\sigma_{op}} = \frac{Z_0}{2R_{sheet} \left( T^{-\frac{1}{2}} - 1 \right)}$$

### Finite Element Method Simulation

The relationship between the stretchability and the interfacial adhesion was investigated using a commercial finite element method tool (ABAQUS v 6.24). The TPU-PEDOT:PSS bilayer was modeled as a deformable 3D solid with 226,929 nodes and 210,160 elements of type CSD8R (8-node linear brick, reduced integration, hourglass control). The TPU was considered as a hyperelastic material based on the Arruda-Boyce model (E: 10 MPa,  $\nu$ : 0.45), while the PEDOT:PSS was considered to be elastic material (E: 500 MPa,  $\nu$ : 0.35). To simulate the stretching and cracking process, the boundary conditions of the model were defined as follows: The model was uniaxially tensile loaded with displacement control, and the interfacial adhesion was characterized with a fracture criterion of VCCT. And, planar crack driving force was calculated for a 10  $\mu\text{m}$  long initial crack with the J-integral method.

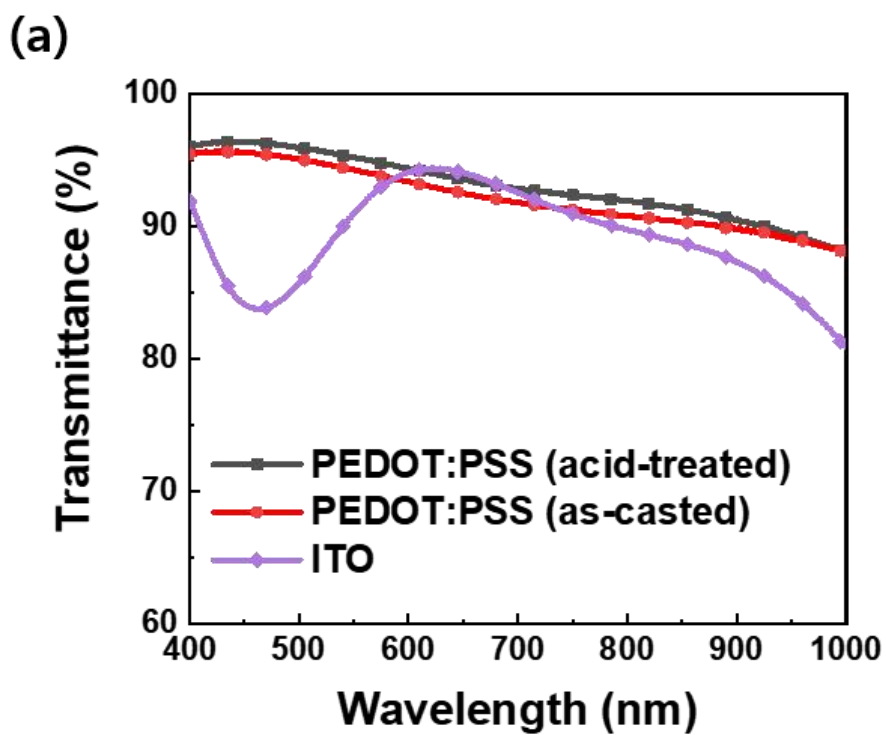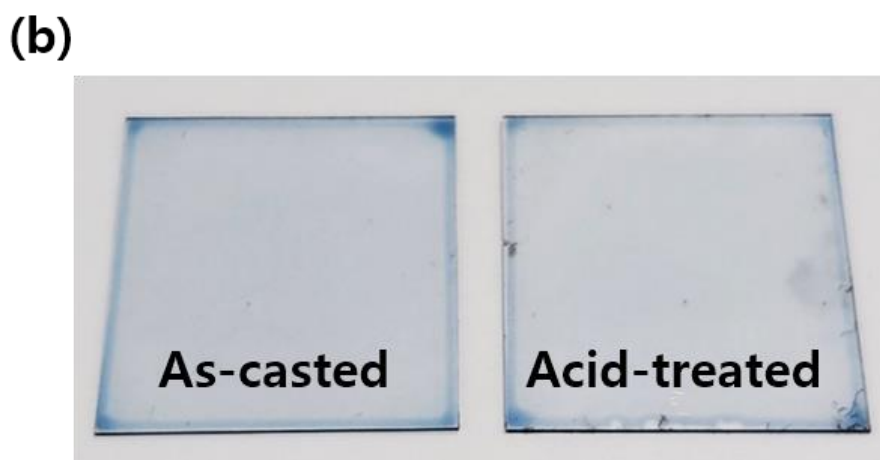

**Fig. S1.** (a) Optical transmittances of as-casted and acid-treated PEDOT:PSS STEs compare with ITO; (b) images of as-casted and acid-treated PEDOT:PSS on ODTS treated glass.

**Table S1.** Sheet resistance, conductivity and work function of PEDOT:PSS depending on acid treatment and transfer method.

|                                   | Substrate | sheet resistance<br>( $\Omega \text{ sq}^{-1}$ ) | conductivity<br>( $\text{S cm}^{-1}$ ) | work function<br>(eV) |
|-----------------------------------|-----------|--------------------------------------------------|----------------------------------------|-----------------------|
| <b>PEDOT:PSS<br/>as-casted</b>    | glass     | 110                                              | 605                                    | 5.0                   |
|                                   | glass     | 92                                               | 961                                    | 5.0                   |
| <b>PEDOT:PSS<br/>acid-treated</b> | TPU (MID) | 88                                               | 959                                    | 5.0                   |
|                                   | TPU (ST)  | 90                                               | 958                                    | 5.0                   |

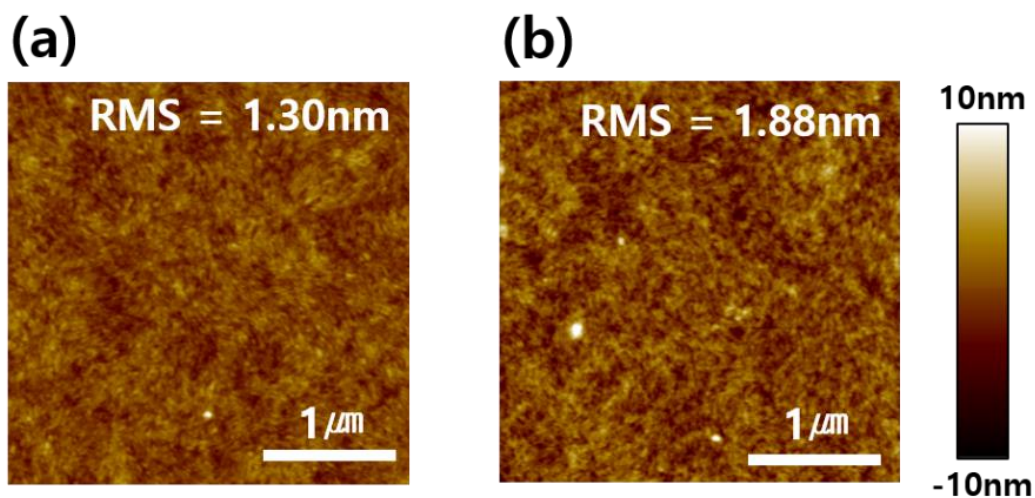

**Fig. S2.** AFM images of (a) as-casted PEDOT:PSS and (b) acid-treated PEDOT:PSS.

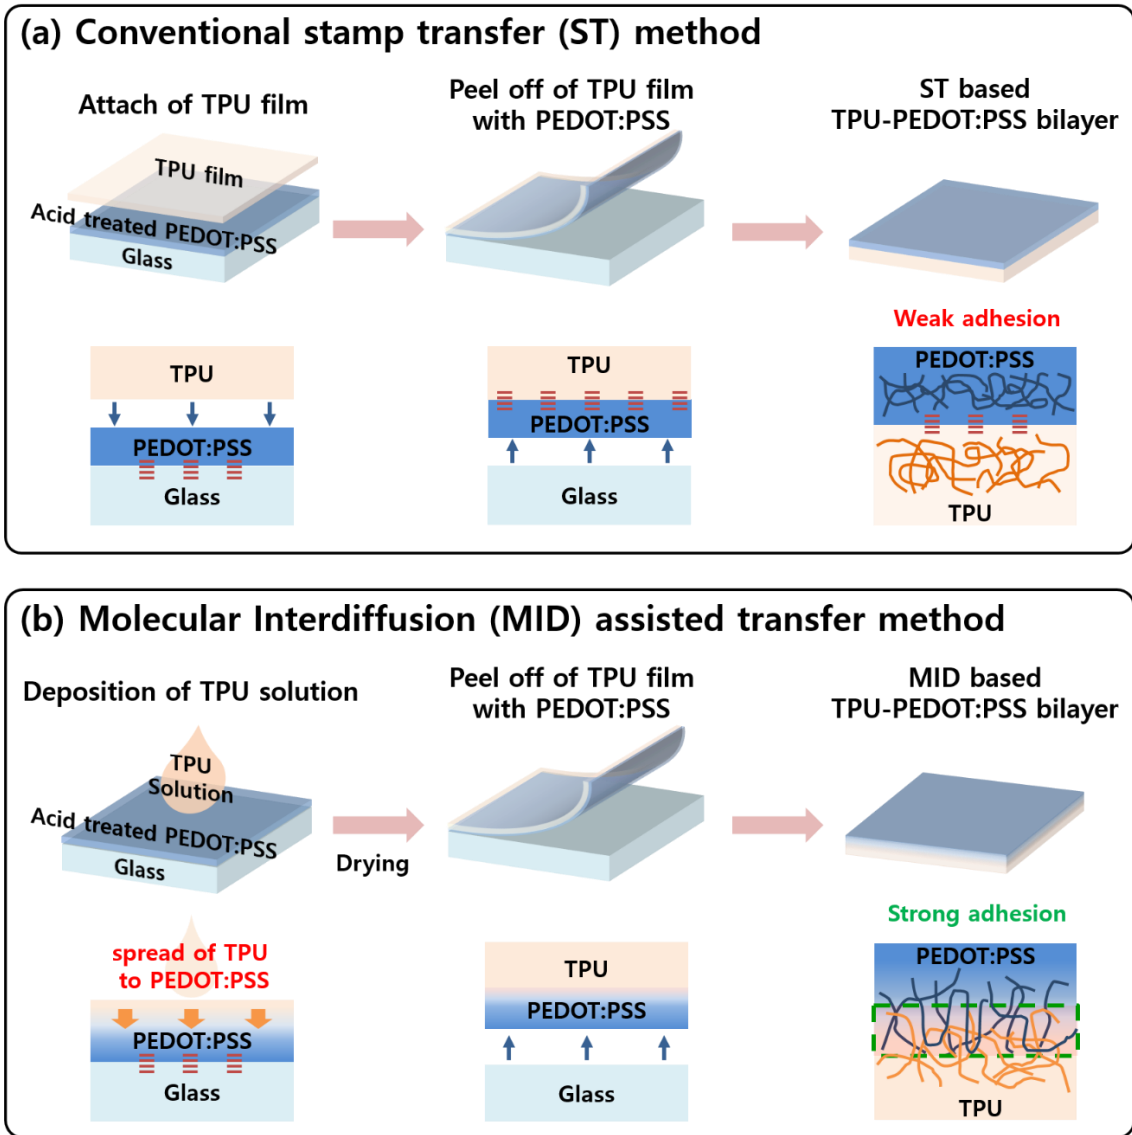

**Fig. S3.** Schematics depicting fabrication procedures of (a) ST- and (b) MID-based TPU-PEDOT:PSS bilayers.



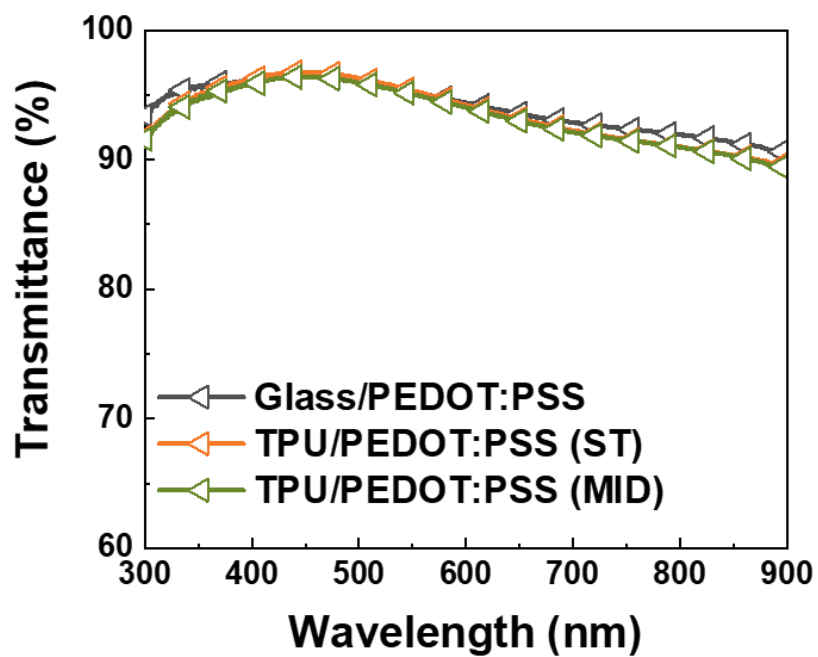

**Fig. S4.** Optical transmittance of PEDOT:PSS STEs on bare glass and on TPU films (ST and MID-assisted).

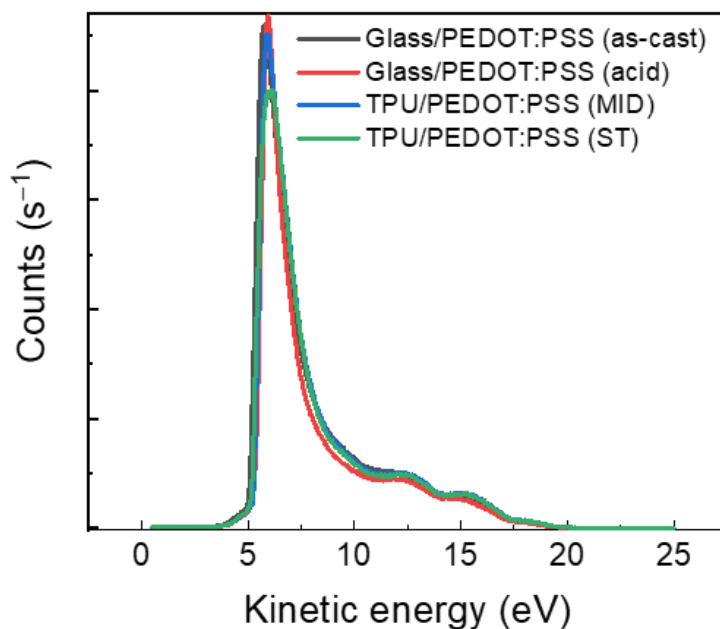

**Fig. S5.** UPS (Ultraviolet photoelectron spectroscopy) profiles of PEDOT:PSS depending on acid treatment and transfer method.

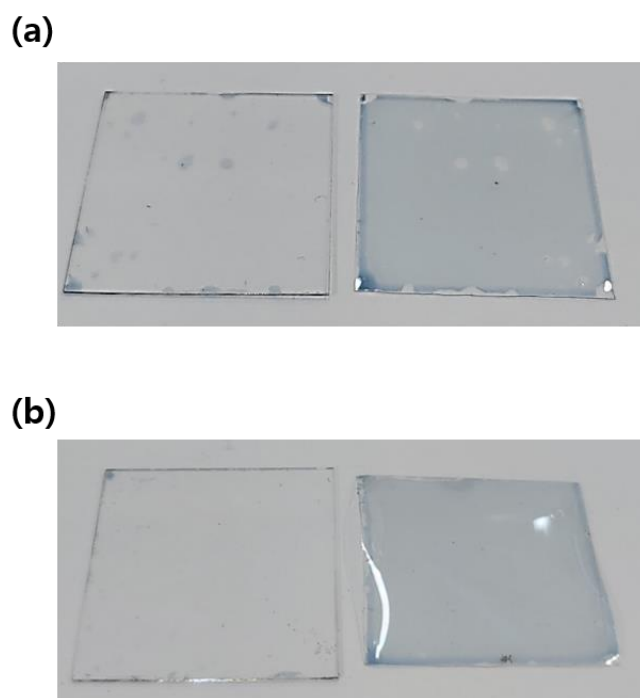

**Fig. S6.** The photographs of (a) ST- and (b) MID-assisted TPU-PEDOT:PSS bilayers (right) from glass substrates (left).

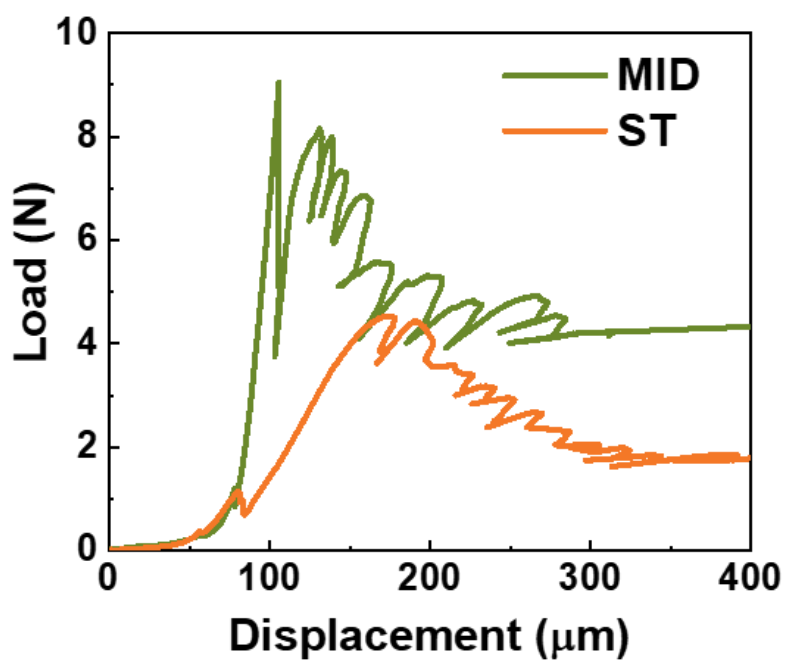

**Fig. S7.** Displacement vs. load profiles of ST- and MID-based TPU-PEDOT:PSS bilayers measured by DCB test.

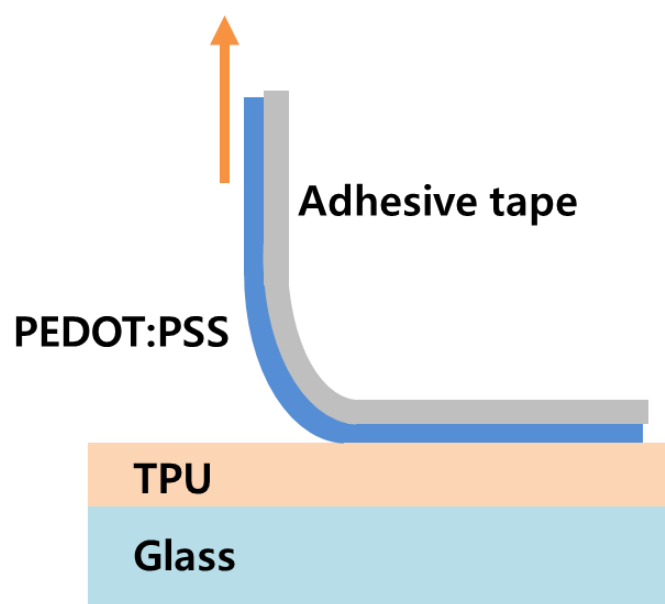

**Fig. S8.** Schematic diagram for the 90° peel test.

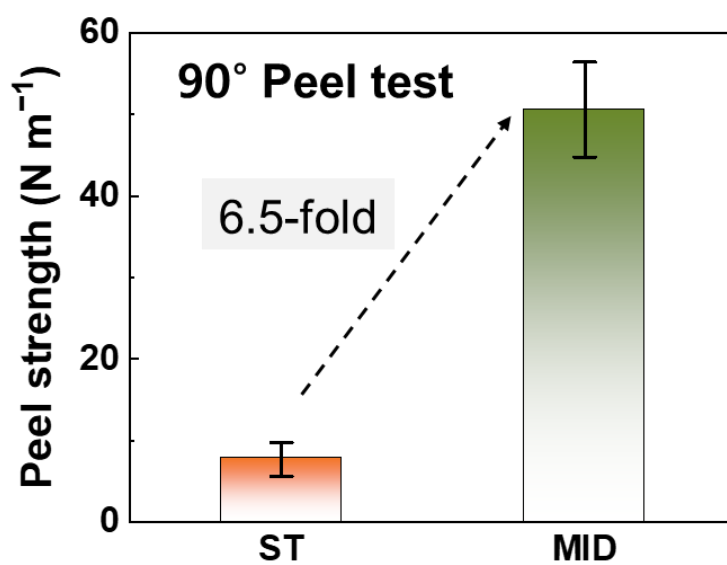

**Fig. S9.** Peel strength of ST- and MID-based bilayers measured from 90° peel test.

### Polymer donors

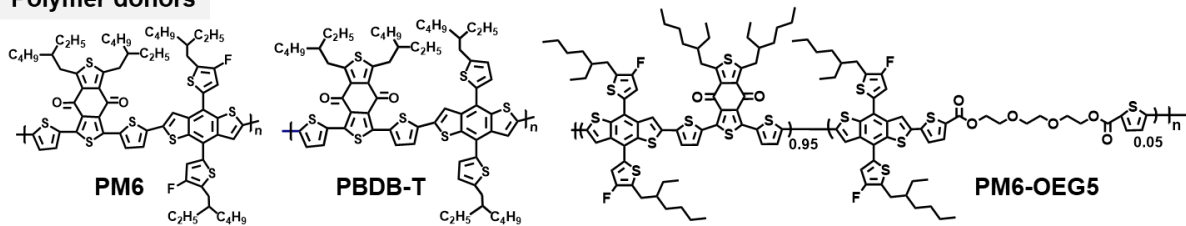

### Small-molecule acceptors

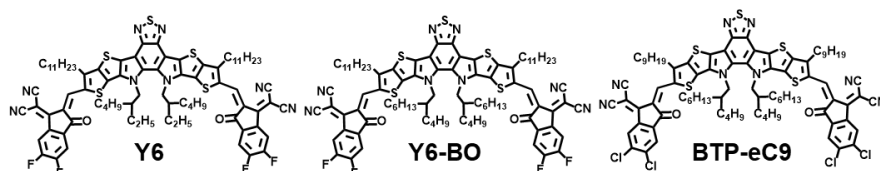

### Polymer acceptors

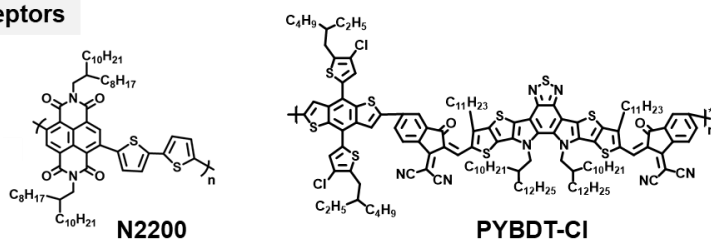

**Fig. S10.** Chemical structures of the active materials used in this study.

**Table S3.** Photovoltaic parameters of the PM6:Y6-BO:N2200-based IS-OSCs with MID-based TPU-PEDOT:PSS as a function of strain.

| <b>Strain (%)</b> | <b><math>V_{oc}</math> (V)</b> | <b><math>J_{sc}</math> (mA cm<sup>-2</sup>)</b> | <b>FF (%)</b> | <b>PCE (%)</b> |
|-------------------|--------------------------------|-------------------------------------------------|---------------|----------------|
| 0                 | 0.85                           | 23.2                                            | 65.9          | 13.1           |
| 10                | 0.86                           | 23.1                                            | 67.4          | 13.4           |
| 20                | 0.86                           | 23.3                                            | 66.9          | 13.5           |
| 30                | 0.86                           | 23.8                                            | 61.7          | 13.0           |
| 40                | 0.85                           | 22.3                                            | 55.3          | 9.4            |
| 50                | 0.85                           | 19.7                                            | 44.3          | 7.5            |

**Table S4.** Photovoltaic parameters of the PM6:Y6-BO:N2200-based IS-OSCs with ST-based TPU-PEDOT:PSS as a function of strain.

| <b>Strain (%)</b> | <b><math>V_{oc}</math> (V)</b> | <b><math>J_{sc}</math> (mA cm<sup>-2</sup>)</b> | <b>FF (%)</b> | <b>PCE (%)</b> |
|-------------------|--------------------------------|-------------------------------------------------|---------------|----------------|
| 0                 | 0.85                           | 23.0                                            | 67.8          | 13.3           |
| 10                | 0.87                           | 22.9                                            | 64.6          | 12.7           |
| 20                | 0.88                           | 22.5                                            | 59.3          | 11.7           |
| 30                | 0.87                           | 21.8                                            | 45.3          | 8.6            |
| 40                | 0.87                           | 19.9                                            | 36.7          | 6.4            |
| 50                | 0.86                           | 14.7                                            | 31.6          | 4.0            |

**Table S5.** Photovoltaic parameters of the PM6:Y6-based IS-OSCs with MID-based TPU-PEDOT:PSS as a function of strain.

| <b>Strain (%)</b> | <b><math>V_{oc}</math> (V)</b> | <b><math>J_{sc}</math> (mA cm<sup>-2</sup>)</b> | <b>FF (%)</b> | <b>PCE (%)</b> |
|-------------------|--------------------------------|-------------------------------------------------|---------------|----------------|
| 0                 | 0.81                           | 20.44                                           | 63.54         | 10.56          |
| 10                | 0.82                           | 20.50                                           | 63.00         | 10.65          |
| 20                | 0.82                           | 20.33                                           | 63.53         | 10.61          |
| 30                | 0.83                           | 19.62                                           | 48.48         | 7.86           |
| 40                | 0.80                           | 7.92                                            | 35.18         | 2.22           |
| 50                | 0.78                           | 4.05                                            | 35.52         | 1.12           |

**Table S6.** Photovoltaic parameters of the PM6:Y6-based IS-OSCs with ST-based TPU-PEDOT:PSS as a function of strain.

| <b>Strain (%)</b> | <b><math>V_{oc}</math> (V)</b> | <b><math>J_{sc}</math> (mA cm<sup>-2</sup>)</b> | <b>FF (%)</b> | <b>PCE (%)</b> |
|-------------------|--------------------------------|-------------------------------------------------|---------------|----------------|
| 0                 | 0.85                           | 20.38                                           | 60.40         | 10.52          |
| 10                | 0.85                           | 20.35                                           | 59.16         | 10.24          |
| 20                | 0.85                           | 20.09                                           | 51.25         | 8.75           |
| 30                | 0.53                           | 13.21                                           | 31.87         | 2.23           |
| 40                | 0.51                           | 12.95                                           | 29.53         | 1.95           |
| 50                | 0.41                           | 10.68                                           | 24.22         | 1.06           |

**Table S7.** Photovoltaic parameters of the PM6-OEG5:BTP-eC9-based IS-OSCs with MID-based TPU-PEDOT:PSS as a function of strain.

| <b>Strain (%)</b> | <b><math>V_{oc}</math> (V)</b> | <b><math>J_{sc}</math> (mA cm<sup>-2</sup>)</b> | <b>FF (%)</b> | <b>PCE (%)</b> |
|-------------------|--------------------------------|-------------------------------------------------|---------------|----------------|
| 0                 | 0.86                           | 23.43                                           | 63.08         | 12.69          |
| 10                | 0.86                           | 23.69                                           | 63.96         | 13.03          |
| 20                | 0.86                           | 23.99                                           | 61.70         | 12.74          |
| 30                | 0.85                           | 20.57                                           | 57.45         | 10.02          |
| 40                | 0.84                           | 22.59                                           | 49.21         | 9.31           |
| 50                | 0.82                           | 19.52                                           | 43.41         | 6.98           |

**Table S8.** Photovoltaic parameters of the PM6-OEG5:BTP-eC9-based IS-OSCs with ST-based TPU-PEDOT:PSS as a function of strain.

| <b>Strain (%)</b> | <b><math>V_{oc}</math> (V)</b> | <b><math>J_{sc}</math> (mA cm<sup>-2</sup>)</b> | <b>FF (%)</b> | <b>PCE (%)</b> |
|-------------------|--------------------------------|-------------------------------------------------|---------------|----------------|
| 0                 | 0.85                           | 23.48                                           | 62.10         | 12.38          |
| 10                | 0.84                           | 23.25                                           | 62.10         | 12.11          |
| 20                | 0.85                           | 22.52                                           | 58.37         | 11.11          |
| 30                | 0.82                           | 14.56                                           | 37.81         | 4.52           |
| 40                | 0.83                           | 10.57                                           | 25.46         | 2.24           |
| 50                | 0.82                           | 9.16                                            | 19.87         | 1.49           |

**Table S9.** Photovoltaic parameters of the PBDB-T:PYBDT-Cl-based IS-OSCs with MID-based TPU-PEDOT:PSS as a function of strain.

| <b>Strain (%)</b> | <b><math>V_{oc}</math> (V)</b> | <b><math>J_{sc}</math> (mA cm<sup>-2</sup>)</b> | <b>FF (%)</b> | <b>PCE (%)</b> |
|-------------------|--------------------------------|-------------------------------------------------|---------------|----------------|
| 0                 | 0.89                           | 17.77                                           | 67.74         | 10.77          |
| 10                | 0.89                           | 18.00                                           | 65.54         | 10.52          |
| 20                | 0.90                           | 16.51                                           | 70.30         | 10.44          |
| 30                | 0.88                           | 15.41                                           | 61.14         | 8.26           |
| 40                | 0.88                           | 15.91                                           | 58.08         | 8.09           |
| 50                | 0.84                           | 15.63                                           | 50.84         | 6.70           |

**Table S10.** Photovoltaic parameters of the PBDB-T:PYBDT-Cl-based IS-OSCs with ST-based TPU-PEDOT:PSS as a function of strain.

| <b>Strain (%)</b> | <b><math>V_{oc}</math> (V)</b> | <b><math>J_{sc}</math> (mA cm<sup>-2</sup>)</b> | <b>FF (%)</b> | <b>PCE (%)</b> |
|-------------------|--------------------------------|-------------------------------------------------|---------------|----------------|
| 0                 | 0.90                           | 18.39                                           | 69.93         | 11.53          |
| 10                | 0.90                           | 17.04                                           | 70.95         | 10.85          |
| 20                | 0.88                           | 15.26                                           | 58.28         | 7.86           |
| 30                | 0.69                           | 14.47                                           | 38.94         | 3.88           |
| 40                | 0.45                           | 11.78                                           | 34.05         | 1.79           |
| 50                | 0.42                           | 9.77                                            | 32.74         | 1.34           |



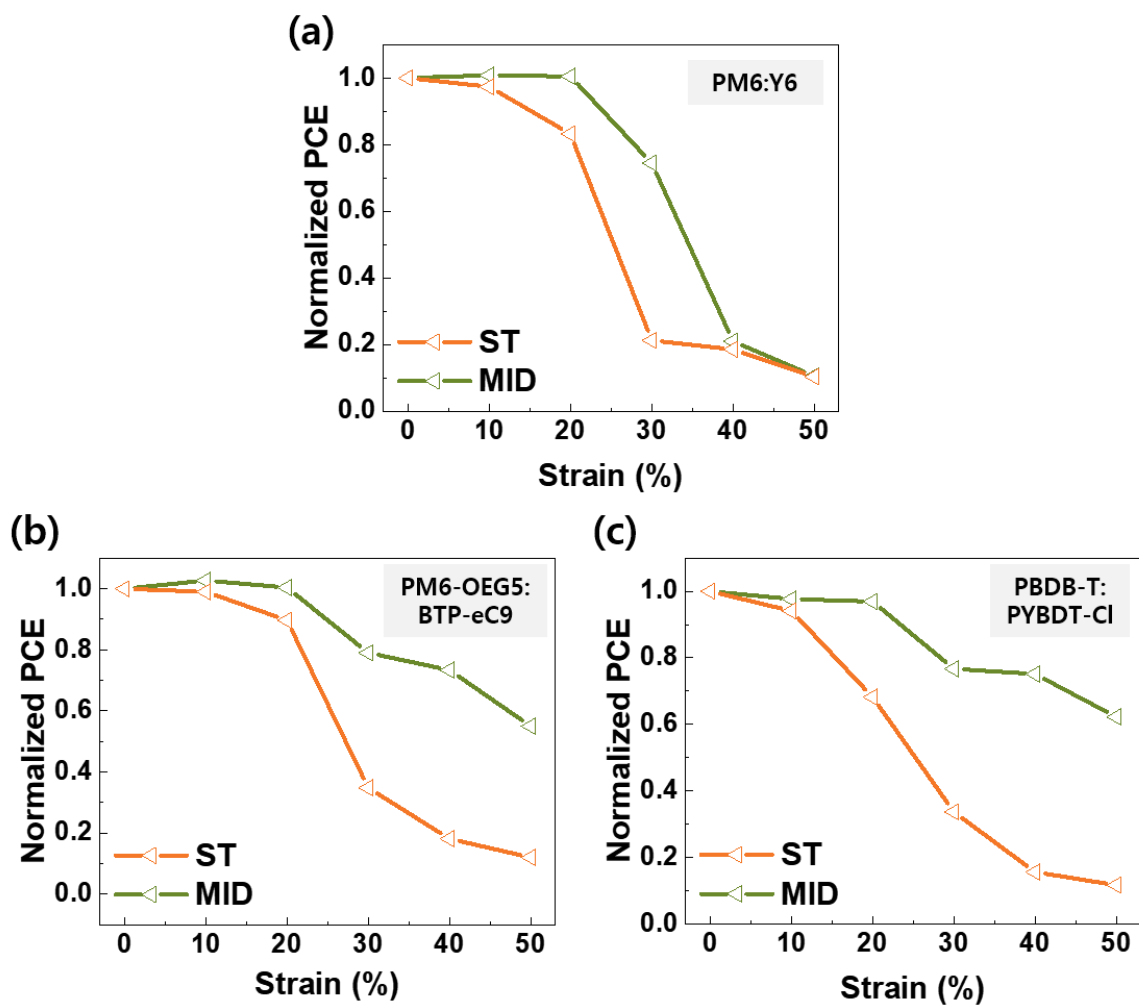

**Fig. S11.** PCE of (a) PM6:Y6, (b) PM6-OEG5:BTP-eC9 and (c) PBDB-T:PYBDT-Cl based IS-OSCs under strains.

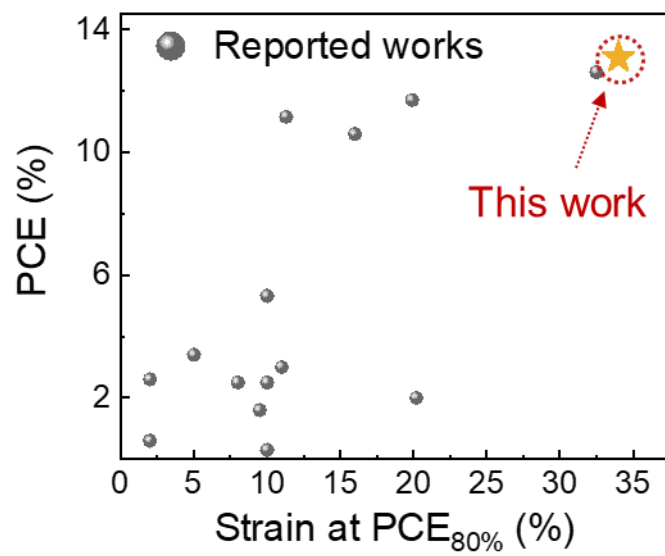

**Fig. S12.** PCE versus strain plots for IS-OSCs from the reported studies and this study.

**Table S11.** Device structures, mechanical and photovoltaic performances of reported IS-OSCs. The PCE<sub>80%</sub> values were estimated by interpolation of the data reported in the papers.

| Year | Device structure                                               | Active Layer                   | PCE [%]     | Strain at PCE <sub>80%</sub> [%] | Ref.             |
|------|----------------------------------------------------------------|--------------------------------|-------------|----------------------------------|------------------|
| 2012 | UV/O <sub>3</sub> -treated PDMS/PEDOT:PSS/Active Layer/EGaIn   | P3HT:PCBM                      | ~1          | -                                | 1                |
|      |                                                                | P3DDT:PCBM                     | 0.59        | -                                | 2                |
| 2013 | PDMS/PEDOT:PSS/Active Layer/EGaIn                              | P3HT:PCBM                      | 0.59        | -                                | 2                |
| 2016 | PU/PEDOT:PSS/PEI/Active Layer/PEDOT:PSS/PU                     | P3HpT:PCBM                     | 1.25        | -                                | 3                |
| 2017 | PUA-AgNW/SWNT/PEDOT:PSS/Active Layer/PEIE/SWNT/AgNW-PUA        | PTB7-Th:PC <sub>71</sub> BM    | 2.90        | -                                | 4                |
|      |                                                                | PTB7-Th:PCBM                   | 5.32        | 8.1                              | 5                |
| 2017 | 3M tape/PEI/Ag/PH1000/Active Layer/EGaIn                       | PTB7-Th:N2200                  | 2.02        | 20.2                             | 5                |
|      |                                                                | PTB7-Th:N2200                  | 2.02        | 20.2                             |                  |
| 2018 | 3M tape/PEDOT:PSS/Active Layer/PFN-NBR/EGaIn                   | PTB7-Th:ITIC                   | 1.66        | 10.4                             | 6                |
|      |                                                                | PTB7-Th:P(NDI2HD-T)            | 3.00        | 15.7                             |                  |
| 2019 | Ag mesh/PEDOT:PSS/Active Layer/PEIE/Ag/Parylene                | PTzNTz: PC <sub>71</sub> BM    | 9.70        | 7.7                              | 7                |
| 2021 | PDMS/PH1000/Active Layer/EGaIn                                 | PBDB-T:PCE10:N2200 (1.2:0.8:1) | 6.33        | 11.2                             | 8                |
|      |                                                                | PM6:Y7                         | 11.2        | 12.4                             | 9                |
| 2021 | TPU/PH1000/AI4083/Active Layer/PNDIT-F3N-Br/EGaIn              | PM6:PCBM                       | 5.7         | 5.1                              |                  |
|      |                                                                | PCE12:N2200                    | 5.0         | 42.3                             |                  |
| 2021 | TPU/AgNW/PEDOT:PSS/Active Layer/EGaIn                          | PTB7-Th:IEICO-4F               | 10.1        | 12.0                             | 10               |
| 2022 | TPU/PH1000/AI4083/Active Layer/PNDIT-F3N-Br/EGaIn              | PM6:Y7:N2200 (1:0.8:0.2)       | 11.71       | 19.9                             | 11               |
| 2022 | TPU/PH1000/AI4083/Active Layer/PNDIT-F3N-Br/EGaIn              | PhAm5:Y7                       | 12.7        | 31.6                             | 12               |
| 2022 | MID-based TPU-PEDOT:PSS/AI4083/Active Layer/PNDIT-F3N-Br/EGaIn | PM6:Y6-BO:N2200                | <b>13.1</b> | <b>34.0</b>                      | <b>This Work</b> |

## References

1. D. J. Lipomi, J. A. Lee, M. Vosgueritchian, B. C. K. Tee, J. A. Bolander and Z. A. Bao, *Chem. Mater.*, 2012, **24**, 373-382.
2. S. Savagatrup, A. S. Makaram, D. J. Burke and D. J. Lipomi, *Adv. Funct. Mater.*, 2014, **24**, 1169-1181.
3. E. J. Sawyer, A. V. Zaretski, A. D. Printz, N. V. de los Santos, A. Bautista-Gutierrez and D. J. Lipomi, *Ext. Mech.Lett.*, 2016, **8**, 78-87.
4. L. Li, J. J. Liang, H. E. Gao, Y. Li, X. F. Niu, X. D. Zhu, Y. Xiong and Q. B. Pei, *ACS Appl. Mater. Interfaces*, 2017, **9**, 40523-40532.
5. Y. Y. Yu, C. H. Chen, C. C. Chueh, C. Y. Chiang, J. H. Hsieh, C. P. Chen and W. C. Chen, *ACS Appl. Mater. Interfaces*, 2017, **9**, 27853-27862.
6. Y. T. Hsieh, J. Y. Chen, S. Fukuta, P. C. Lin, T. Higashihara, C. C. Chueh and W. C. Chen, *ACS Appl. Mater. Interfaces*, 2018, **10**, 21712-21720.
7. Z. Jiang, K. Fukuda, W. C. Huang, S. Park, R. Nur, M. O. G. Nayeem, K. Yu, D. Inoue, M. Saito, H. Kimura, T. Yokota, S. Umezue, D. Hashizume, I. Osaka, K. Takimiya and T. Someya, *Adv. Funct. Mater.*, 2019, **29**, 1808378.
8. Q. L. Zhu, J. W. Xue, L. Zhang, J. L. Wen, B. J. Lin, H. B. Naveed, Z. Z. Bi, J. M. Xin, H. Zhao, C. Zhao, K. Zhou, S. Z. Liu and W. Ma, *Small*, 2021, **17**, 2007011.
9. J. Noh, G. U. Kim, S. Han, S. J. Oh, Y. Jeon, D. Jeong, S. W. Kim, T. S. Kim, B. J. Kim and J. Y. Lee, *ACS Energy Lett.*, 2021, **6**, 2512-2518.
10. Z. Y. Wang, M. C. Xu, Z. L. Li, Y. R. Gao, L. Yang, D. Zhang and M. Shao, *Adv. Funct. Mater.*, 2021, **31**, 2103534.
11. J.-W. Lee, G. U. Kim, D. J. Kim, Y. Jeon, S. Li, T. S. Kim, J. Y. Lee and B. J. Kim, *Adv. Energy Mater.*, 2022, **12**, 2200887.
12. J.-W. Lee, S. Seo, S. W. Lee, G. U. Kim, S. Han, T. N. Phan, S. Lee, S. Li, T. S. Kim, J. Y. Lee and B. J. Kim, *Adv. Mater.*, 2022, 2207544.
